# Supplementary material
Source: publisher figshare collection journal article supplement (https://sage.figshare.com/ndownloader/files/17090132)
Supplement: Supplementary file 1 [file 17090132]

## Online Supplement

### Table S1

#### List of contributors

##### The following contributors participated in data acquisition:

From Clinic of Neurology Clinical Center, Skopje, Macedonia, Tatjana Petkovska-Boskova.  
 From Hospital Germans Trias i Pujol, Badalona, Spain, Dr Cristina Ramo.  
 From Hospital Universitario Virgen de Valme, Seville, Spain, Dr Ricardo Fernandez Bolaños.  
 From Razi Hospital, Manouba, Tunisia, Dr Riadh Gouider.  
 From Monash Medical Centre, Melbourne, Australia, Dr Ernest Butler.  
 From Mater Dei Hospital, Balzan, Malta, Dr Norbert Vella.  
 From Hospital Universitario de la Ribera, Alzira, Spain, Dr Jose Andres Dominguez.  
 From Isfahan University of Medical Sciences, Isfahan, Iran, Dr Vahid Shaygannejad.  
 From New York University Langone Medical Center, New York, United States, Dr Ilya Kister.  
 From CIREN, Havana, Cuba, Dr Jose Antonio Cabrera-Gomez.  
 From MS Clinic, Hopital Tenon, Paris, France, Dr Etienne Roullet.  
 From University Hospital Nijmegen, Nijmegen, Netherlands, Dr Cees Zwanikken.  
 From Franciscus Ziekenhuis, Roosendaal, Netherlands, Dr Leontien Den Braber-Moerland.  
 From University “G. d’Annunzio”, Chieti, Italy, Dr Giovanna De Luca, Dr Valeria Di Tommaso, Dr Daniela Travaglini, Dr Erika Pietrolongo, Dr Maria di Ioia, Dr Deborah Farina and Dr Luca Mancinelli.  
 From University of Melbourne, Melbourne, Australia, Dr Mark Marriott, Dr Trevor Kilpatrick, Dr John King, Dr Katherine Buzzard, Dr Ai-Lan Nguyen, Dr Chris Dwyer, Dr Mastura Monif, Dr J William L Brown and Dr Amy Kunchok.  
 From Box Hill Hospital, Melbourne, Australia, Ms Jodi Haartsen.  
 From Azienda Ospedaliera Universitaria, Modena, Italy, Dr Francesca Vitetta, Dr Anna Maria Simone.  
 From Azienda Sanitaria Unica Regionale Marche - AV3, Macerata, Italy, Dr Matteo Diamanti, Dr Elisabetta Cartechini.  
 From University of Parma, Parma, Italy, Dr Erica Curti, Dr Elena Tsantes.  
 From Hospital Italiano, Buenos Aires, Argentina, Dr Juan Ingacio Rojas.  
 From Jahn Ferenc Teaching Hospital, Budapest, Hungary, Dr Krisztian Kasa.  
 From University of Western Australia, Nedlands, Australia, Dr Marzena Fabis-Pedrin.

##### Administrative and technical support was provided by:

From the MSBase Administrations Ms Charlotte Sartori, Ms Sabah Quddus and Ms  
 From Rodanotech, Geneva, Switzerland; Mr Samir Mechat, Mr Matthieu Corageoud, Mr Alexandre Bulla.

**Table S2**  
**Data quality procedure**

- Duplicate patient records were removed.
- Centres with <10 patient records were excluded (irrespective of patients' inclusion in the study).
- Patients with missing date of birth were excluded.
- MS onset dates after the MSBase data extract date were removed.
- Patients with missing date of the first clinical presentation of MS were excluded.
- The dates of MS onset and the first recorded MS course were aligned.
- Patients with the age at onset outside the 0-100 range were excluded.
- A logical sequence of the MS courses (e.g. clinically isolated syndrome, relapsing-remitting MS, secondary progressive MS) was assured.
- Entries with the initiation of progressive MS prior to its clinical onset of MS were excluded.
- Visits with missing visit date or the recorded date before the clinical MS onset or after the date of MSBase data extract were removed.
- EDSS scores outside the range of possible EDSS values were removed.
- Duplicate visits were merged.
- MS relapses with missing visit date or the recorded date after the date of MSBase data extract were removed.
- Duplicate MS relapses were merged.
- Relapses occurring within 30 days of each other were merged.
- Visits preceded by relapses were identified and time from the last relapse was calculated for each visit.
- Therapies were labelled as discontinued or continuing.
- Therapies with erroneous date entries were removed (e.g. commencement date > termination date, commencement after the MSBase data extract date, commencement of disease modifying therapy before the year 1980).
- MS disease modifying therapies were identified and labelled.
- Duplicate treatment entries were removed.
- Where multiple disease modifying therapies were recorded simultaneously, treatment end date of the previous therapy was imputed as the commencement date of the following therapy.
- Consecutive entries for certain disease modifying therapies were merged into a continuous treatment entry, given that the gap between the entries did not exceed 190 days for mitoxantrone, 365 days for cladribine, 90 days for other disease modifying therapies.
- The default duration of treatment effect was recorded as 190 days (mitoxantrone), 5 years (alemtuzumab) or 365 days (cladribine) from treatment commencement.

**Figure S1**  
**Illustration of study design**

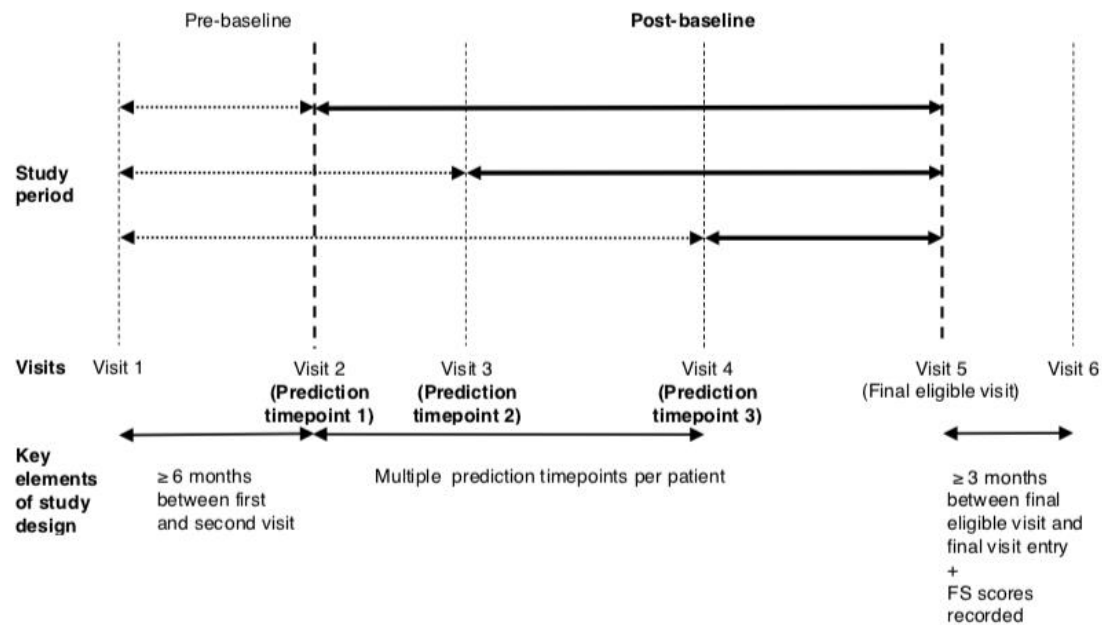

Each vertical line represents one visit entry where the minimum dataset and Expanded Disability Status Scale score was recorded. A ‘prediction time point’ was defined as any visit recorded during the relapsing remitting disease course with: (i) at least one visit entry at least six months prior and, (ii) at least two subsequent visits. At each prediction time point visit, the patient’s risk of SPMS was re-evaluated using Cox models. The period between the first visit entry and each prediction time point was called the pre-baseline period (identified with thin arrows). The post-baseline period (identified with bold arrows) was defined as the time between each prediction time point and the final eligible visit (i.e. the last visit that was followed by an additional visit at least three months later). In this example, the patient had 6 recorded visits, and the risk of SPMS was evaluated at 3 of them.

FS: functional system; SPMS: secondary progressive multiple sclerosis

## Definitions of the study variables

The age of the patient, disease duration, annualised relapse rate, number of relapses in the previous year, proportion of time on DMTs (pre- and post-baseline), annualised EDSS slope and frequency of visits during the post-baseline period were calculated at each prediction time point.

A relapse was defined as new symptoms or exacerbation of existing symptoms persisting for  $\geq 24$  hours, in the absence of concurrent illness/fever, and occurring  $\geq 30$  days after a previous relapse (Schumacher et al., *Ann N Y Acad Sci* 1965;122:552-68). Annualised relapse rate was calculated as the number of previous relapses divided by the duration of the pre-baseline period.

Disability was scored using EDSS by accredited EDSS scorers (Neurostatus certification was required at the participating centres), and scores obtained  $< 30$  days after a relapse were excluded. The annualised EDSS slope was calculated using the EDSS scores recorded over the pre-baseline period, fitted by a linear regression model. The date of symptom onset was included as an extra time point in this calculation, and was assigned an EDSS score of 0; this date was included so as to represent the day prior to the reported onset of the first MS symptoms. The annualised EDSS slope was then categorised into descriptions of the gradient: improving (gradient  $< -0.05$  EDSS points per year); stable (gradient between  $-0.05$  and  $0.05$  inclusive); slow worsening (gradient  $> 0.05$  and  $\leq 0.24$ ); and rapid worsening (gradient  $> 0.24$ ). These values were determined as follows: a caliper of 0.05 was chosen around the zero gradient to become the stable category; any negative gradient less than  $-0.05$  was denoted to be an improving course; and the median of the remaining positive values ( $0.24$  EDSS points per year) was used to differentiate slow from rapid worsening. These descriptions collectively were denoted as the annualised disability trajectory.

The time spent on DMT was defined by the treatment start and stop dates. The proportion of time on therapy was calculated as the length of time spent on therapy in the pre- or post-baseline period divided by either the disease duration (pre-baseline) or time between each prediction time point and the SPMS conversion date or the final eligible visit (post-baseline). Due to the relatively small number of patients treated with newer agents, the proportion of time spent on each therapy was not stratified based on efficacy.

Qualitative MRI information (i.e. presence or absence of new or enlarging T2 lesions or contrast-enhancing lesions) was recorded by neurologists in the participating centres. Recent brain MRI activity was defined as the presence of either new or enlarging T2 lesions or contrast-enhancing lesions over the 2 years preceding each prediction time point. To complete the sensitivity analyses, the presence or absence of T2 lesions in the brain over the past 2 years or in the spinal cord at any time, and the presence of oligoclonal bands in the CSF that were not mirrored in the serum at any time, were calculated.

**Table S3****Number of included patients per centre (primary analysis)**

| <b>Centre</b>                                                                        | <b>Country</b> | <b>Patients</b> |
|--------------------------------------------------------------------------------------|----------------|-----------------|
| Hospital Fernandez, Capital Federal, Argentina                                       | Argentina      | 71              |
| INEBA - Institute of Neuroscience Buenos Aires, Buenos Aires, Argentina              | Argentina      | 72              |
| Instituto de Neurociencias Cordoba, Cordoba, Argentina                               | Argentina      | 2               |
| Hospital Italiano, Buenos Aires, Argentina                                           | Argentina      | 75              |
| Sanatorio Allende, Cordoba, Argentina                                                | Argentina      | 11              |
| University of Western Australia, Nedlands, Australia                                 | Australia      | 12              |
| Brain and Mind Centre, Sydney, Australia                                             | Australia      | 71              |
| University of Melbourne, Melbourne, Australia                                        | Australia      | 468             |
| University Newcastle, Newcastle, Australia                                           | Australia      | 310             |
| Geelong Hospital, Geelong, Australia                                                 | Australia      | 29              |
| St Vincents Hospital, Fitzroy, Melbourne, Australia                                  | Australia      | 25              |
| Monash Medical Centre, Melbourne, Australia                                          | Australia      | 70              |
| Liverpool Hospital, Sydney, Australia                                                | Australia      | 25              |
| Box Hill Hospital, Melbourne, Australia                                              | Australia      | 445             |
| Westmead Hospital, Sydney, Australia                                                 | Australia      | 84              |
| Flinders University, Adelaide, Australia                                             | Australia      | 159             |
| University of Queensland, Brisbane, Australia                                        | Australia      | 171             |
| Townsville Hospital, Townsville, Australia                                           | Australia      | 10              |
| Royal Hobart Hospital, Hobart, Australia                                             | Australia      | 17              |
| The Alfred, Melbourne, Australia                                                     | Australia      | 54              |
| Austin Health, Melbourne, Australia                                                  | Australia      | 14              |
| Concord Repatriation General Hospital, Sydney, Australia                             | Australia      | 7               |
| Royal Brisbane and Women's Hospital, Brisbane, Australia                             | Australia      | 18              |
| Cliniques Universitaires Saint-Luc, Brussels, Belgium                                | Belgium        | 260             |
| AZ Alma Ziekenhuis, Sijsele - Damme, Belgium                                         | Belgium        | 10              |
| University Hospital Ghent, Ghent, Belgium                                            | Belgium        | 6               |
| Rehabilitation and MS-Centre Overpelt and Hasselt University, Hasselt, Belgium       | Belgium        | 93              |
| Universidade Metropolitana de Santos, Santos, Brazil                                 | Brazil         | 39              |
| CSSS Saint-Jérôme, Saint-Jerome, Canada                                              | Canada         | 97              |
| Jewish General Hospital, Montreal, Canada                                            | Canada         | 59              |
| Hopital Notre Dame, Montreal, Canada                                                 | Canada         | 1042            |
| CISSS Chaudière-Appalache, Levis, Canada                                             | Canada         | 600             |
| Neuro Rive-Sud, Quebec, Canada                                                       | Canada         | 643             |
| CIREN, Havana, Cuba                                                                  | Cuba           | 94              |
| General University Hospital and Charles University in Prague, Prague, Czech Republic | Czech Republic | 1457            |
| Nemocnice Jihlava, Jihlava, Czech Republic                                           | Czech Republic | 133             |
| Kommunehospitalet, Arhus C, Denmark                                                  | Denmark        | 111             |
| Hospital Universitario Virgen de Valme, Seville, Spain                               | Spain          | 146             |
| Hospital Universitario Donostia, San Sebastián, Spain                                | Spain          | 64              |
| Hospital Clinico San Carlos, Madrid, Spain                                           | Spain          | 111             |
| Hospital General Universitario de Alicante, Alicante, Spain                          | Spain          | 11              |
| Hospital Universitario Virgen Macarena, Sevilla, Spain                               | Spain          | 825             |
| Hospital de Galdakao-Usansolo, Galdakao, Spain                                       | Spain          | 108             |
| Hospital Germans Trias i Pujol, Badalona, Spain                                      | Spain          | 218             |
| Hospital Universitario de la Ribera, Alzira, Spain                                   | Spain          | 21              |
| Hospital Ramon y Cajal, Madrid, Spain                                                | Spain          | 1               |
| MS Clinic, Hopital Tenon, Paris, France                                              | France         | 15              |
| The Walton Centre for Neurology and Neurosurgery, Liverpool, United Kingdom          | United Kingdom | 1               |

|                                                                                                         |                |              |
|---------------------------------------------------------------------------------------------------------|----------------|--------------|
| Craigavon Area Hospital, Craigavon, United Kingdom                                                      | United Kingdom | 30           |
| Royal Victoria Hospital, Belfast, United Kingdom                                                        | United Kingdom | 6            |
| South East Trust, Belfast, United Kingdom                                                               | United Kingdom | 43           |
| Veszprém Megyei Csolnoky Ferenc Kórház zrt., Veszprem, Hungary                                          | Hungary        | 8            |
| Jahn Ferenc Teaching Hospital, Budapest, Hungary                                                        | Hungary        | 33           |
| Semmelweis University Budapest, Budapest, Hungary                                                       | Hungary        | 9            |
| University of Debrecen, Debrecen, Hungary                                                               | Hungary        | 18           |
| Péterfy Sándor Hospital, Budapest, Hungary                                                              | Hungary        | 10           |
| Josa András Hospital, Nyiregyhaza, Hungary                                                              | Hungary        | 6            |
| Petz A. County Hospital, Győr, Hungary                                                                  | Hungary        | 6            |
| Szent Imre Hospital, Budapest, Hungary                                                                  | Hungary        | 7            |
| University of Szeged, Szeged, Hungary                                                                   | Hungary        | 9            |
| St Vincent's University Hospital, Dublin, Ireland                                                       | Ireland        | 3            |
| Assaf Harofeh Medical Center, Beer-Yaakov, Israel                                                       | Israel         | 75           |
| Bombay Hospital Institute of Medical Sciences, Mumbai, India                                            | India          | 27           |
| PGIMER, Chandigarh, India                                                                               | India          | 1            |
| Isfahan University of Medical Sciences, Isfahan, Iran                                                   | Iran           | 16           |
| University "G. d'Annunzio", Chieti, Italy                                                               | Italy          | 934          |
| Azienda Sanitaria Unica Regionale Marche - AV3, Macerata, Italy                                         | Italy          | 304          |
| University of Bari, Bari, Italy                                                                         | Italy          | 1102         |
| University of Florence, Florence, Italy                                                                 | Italy          | 109          |
| C. Mondino National Neurological Institute, Pavia, Italy                                                | Italy          | 274          |
| Ospedali Riuniti di Salerno, Salerno, Italy                                                             | Italy          | 198          |
| University of Parma, Parma, Italy                                                                       | Italy          | 219          |
| Azienda Ospedaliera di Rilievo Nazionale San Giuseppe Moscati<br>Avellino, Avellino, Italy              | Italy          | 186          |
| Azienda Ospedaliera Universitaria, Modena, Italy                                                        | Italy          | 575          |
| Ospedale P. A. Micone, Genova, Italy                                                                    | Italy          | 160          |
| Amiri Hospital, Kuwait City, Kuwait                                                                     | Kuwait         | 443          |
| American University of Beirut Medical Center, Beirut, Lebanon                                           | Lebanon        | 36           |
| Clinical Center-Neurology, Skopje, Macedonia                                                            | Macedonia      | 4            |
| Clinic of Neurology Clinical Center, Skopje, Macedonia                                                  | Macedonia      | 22           |
| Mater Dei Hospital, Balzan, Malta                                                                       | Malta          | 22           |
| HOSPITAL KUALA LUMPUR, Kuala Lumpur, Malaysia                                                           | Malaysia       | 1            |
| University Hospital Nijmegen, Nijmegen, Netherlands                                                     | Netherlands    | 144          |
| Franciscus Ziekenhuis, Roosendaal, Netherlands                                                          | Netherlands    | 62           |
| Zuyderland Ziekenhuis, Sittard, Netherlands                                                             | Netherlands    | 392          |
| Groene Hart Ziekenhuis, Gouda, Netherlands                                                              | Netherlands    | 108          |
| Hospital São João, Porto, Portugal                                                                      | Portugal       | 191          |
| Central Military Emergency University Hospital, Bucharest, Romania                                      | Romania        | 8            |
| King Fahad Specialist Hospital-Dammam, Khobar, Saudi Arabia                                             | Saudi Arabia   | 19           |
| Razi Hospital, Manouba, Tunisia                                                                         | Tunisia        | 96           |
| KTU Medical Faculty Farabi Hospital, Trabzon, Turkey                                                    | Turkey         | 339          |
| 19 Mayıs University, Samsun, Turkey                                                                     | Turkey         | 439          |
| Hacettepe University, Ankara, Turkey                                                                    | Turkey         | 14           |
| Istanbul University Cerrahpasa School of Medicine, Istanbul, Turkey                                     | Turkey         | 23           |
| Dokuz Eylül University, Konak/Izmir, Turkey                                                             | Turkey         | 232          |
| Bakirkoy Education and Research Hospital for Psychiatric and<br>Neurological Diseases, Istanbul, Turkey | Turkey         | 132          |
| Haydarpasa Numune Training and Research Hospital, Istanbul, Turkey                                      | Turkey         | 213          |
| New York University Langone Medical Center, New York, United States                                     | United States  | 24           |
| <b>TOTAL</b>                                                                                            |                | <b>15717</b> |

**Table S4****List of disease modifying therapies included in the analysis**

| <b>Disease modifying therapy</b> | <b>Number of patients</b> |
|----------------------------------|---------------------------|
| Rebif                            | 2463                      |
| Natalizumab                      | 2325                      |
| Fingolimod                       | 2059                      |
| Avonex                           | 1699                      |
| Copaxone                         | 1529                      |
| Betaferon-Extavia                | 1485                      |
| Tecfidera                        | 838                       |
| Mitoxantrone                     | 578                       |
| Teriflunomide                    | 324                       |
| Copaxone 40                      | 125                       |
| Rituximab                        | 68                        |
| Plegridy                         | 52                        |
| Alemtuzumab                      | 26                        |
| Cladribine                       | 25                        |
| ASCT                             | 20                        |
| Ocrelizumab                      | 4                         |
| Siponimod                        | 3                         |
| <b>Total</b>                     | <b>13623</b>              |

NB: If a patient was treated with more than one disease modifying therapy, only the highest efficacy agent was included in this table.

**Table S5****Demographic of excluded cohort (n= 28,732)**

|                     | <b>Count (%)</b> | <b>Mean (sd)</b> | <b>Median (quartiles)</b> |
|---------------------|------------------|------------------|---------------------------|
| Age, years          |                  | 39.3 (12.8)      | 38.3 (29.6 , 48.3)        |
| Sex, female         | 20 189 (70%)     |                  |                           |
| MS duration, years  |                  | 7.6 (8.7)        | 4.4 (1.0, 11.3)           |
| EDSS at first visit |                  | 2.8 (2.1)        | 2.0 (1.5 , 4.0)           |

NB:

1,048 patients had no visit data recorded

1,580 patients had no EDSS data recorded

**Table S6: Effect of various factors on risk of secondary progressive multiple sclerosis – univariate analysis.**

| Variable                                      | Hazard ratio | 95% confidence interval | p value |
|-----------------------------------------------|--------------|-------------------------|---------|
| <b>DEMOGRAPHIC FEATURES</b>                   |              |                         |         |
| Sex                                           |              |                         |         |
| <i>Female</i>                                 | Reference    |                         |         |
| <i>Male</i>                                   | 1.15         | 0.98 - 1.33             | 0.079   |
| Current age (years)                           | 1.04         | 1.03 - 1.04             | <0.001  |
| Age of symptom onset (years)                  | 1.02         | 1.01 - 1.03             | 0.034   |
| Disease duration (years)                      | 1.04         | 1.03 - 1.04             | <0.001  |
| <b>CLINICAL FEATURES</b>                      |              |                         |         |
| Disability, EDSS                              | 1.44         | 1.40 - 1.48             | <0.001  |
| Annualised relapse rate                       | 0.92         | 0.82 - 1.03             | 0.158   |
| Relapses previous year                        | 1.15         | 1.10 - 1.20             | <0.001  |
| Annualised EDSS slope                         | 1.56         | 1.48 - 1.64             | <0.001  |
| Annualised disability trajectory <sup>a</sup> |              |                         |         |
| <i>Stable</i>                                 | Reference    |                         |         |
| <i>Improving</i>                              | 0.52         | 0.34 - 0.82             | <0.001  |
| <i>Slow worsening</i>                         | 3.45         | 2.64 - 4.51             | <0.001  |
| <i>Rapid worsening</i>                        | 5.86         | 4.44 – 7.74             | <0.001  |
| Onset symptoms: Visual                        | 0.90         | 0.77 - 1.06             | 0.212   |
| Onset symptoms: Spinal cord                   | 0.88         | 0.75 - 1.04             | 0.131   |
| Onset symptoms: Brainstem                     | 0.91         | 0.77 - 1.07             | 0.243   |
| Onset symptoms: Supratentorial                | 1.10         | 0.95 - 1.27             | 0.226   |
| Onset symptoms: Polysymptomatic               | 0.84         | 0.68 - 1.04             | 0.105   |
| Proportion of time on therapy <sup>b</sup>    | 0.47         | 0.38 - 0.59             | <0.001  |

Fitted with a univariate Cox regression model. Of the 15, 717 patients included in this analysis, 1,546 (10%) became secondarily progressive. Where  $p \leq 0.20$ , variables were included in the multivariable model (Fig. 3).

<sup>a</sup>‘Annualised disability trajectory’ is the annualised EDSS slope categorised into descriptions of the gradient: stable (gradient -0.05 - 0.05 EDSS steps per year), improving (<-0.05), slow worsening (0.05 – 0.24), rapid worsening (>0.24).

<sup>b</sup>‘Proportion of time on therapy’ is the length of time spent on any disease modifying therapy in the pre-baseline period divided by the disease duration.

Onset symptoms were treated as individual variables in the univariate analysis, with the hazard associated with the presence of the onset symptom being compared to the hazard of the absence of the symptom. Patients with multiple onset symptoms were counted both in the phenotype of the symptoms they experienced, and again in the polysymptomatic group.

EDSS: expanded disability status scale.
